# Supplementary material
Source: bioRxiv or medRxiv preprint supplement (https://medrxiv.org/highwire/filestream/81746/field_highwire_adjunct_files/0/2020.05.17.20082123-1.pdf)
Supplement: Supplementary file [file 2020.05.17.20082123-1.pdf]

# High Flow Nasal Prongs & Nitric Oxide Assembly

## NIV NITRIC OXIDE WITH HIGH FLOW NASAL PRONGS

### EQUIPMENT REQUIRED:

- Nitric oxide cart/INOmaxDSir and purged circuit plus:
- Hi-Flow O2 with Humidified circuit (RT 202)
- IKARIA Adapters 22F x 15M and 22M/15F x 22M/15F
- Optiflow Nasal Cannula

Please ensure rebreather bag plus mask is attached to Inoblender. In an emergency situation, please ensure Inoblender is dialled to prescribed Nitric Oxide dose and flow meter is at a flow of 15L/min.

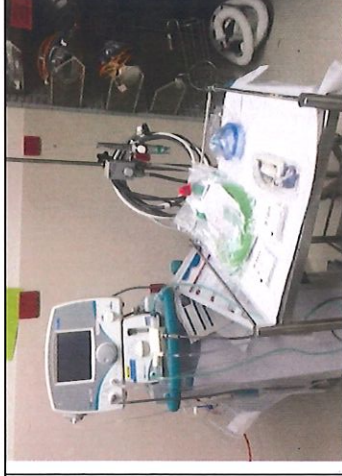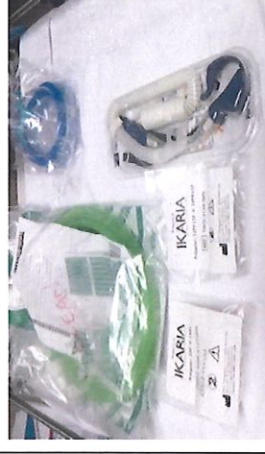

### **NO + HI-FLOW SET-UP:**

- Connect Hi flow to air and oxygen on pendant
- Connect INOmaxDSir oxygen hose to pendant and orange power cord to electrical source
- Attach Injector module to humidifier with flow arrow pointing **TOWARDS** the humidifier.
- Connect short blue humidified circuit tubing to injector module using a 22M/15F x 22M/15F adapter. Connect the other end of the short blue tubing to the noise filter on the flow meter.
- Connect long blue humidified tubing with temperature/heater wires, as per normal humidified circuit set up.

### **OPTIFLOW NASAL CANNULA SET-UP**

- Attach Gas Sample Tee to long blue tubing
- Connect IKARIA Adapter 22M/15F x 22M/15F to Gas Sample Tee
- Connect IKARIA Adapter 22mmID X 22mmID to opposite side of gas sample tree
- Connect Optiflow Nasal Cannula to IKARIA adapter 22mmID X 22mmID

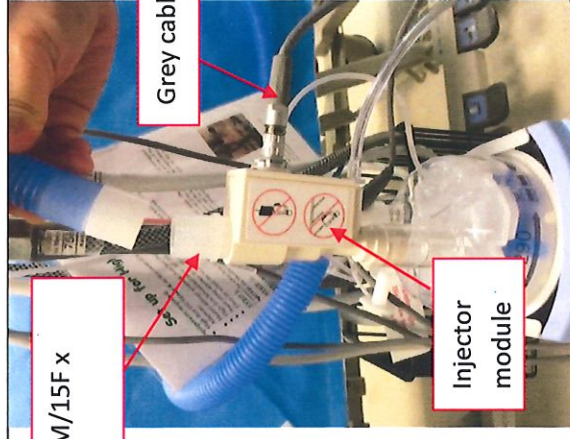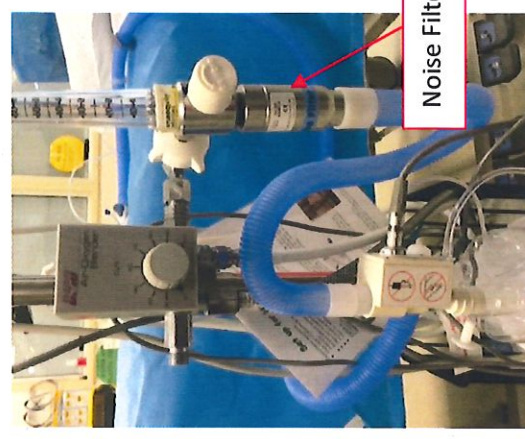

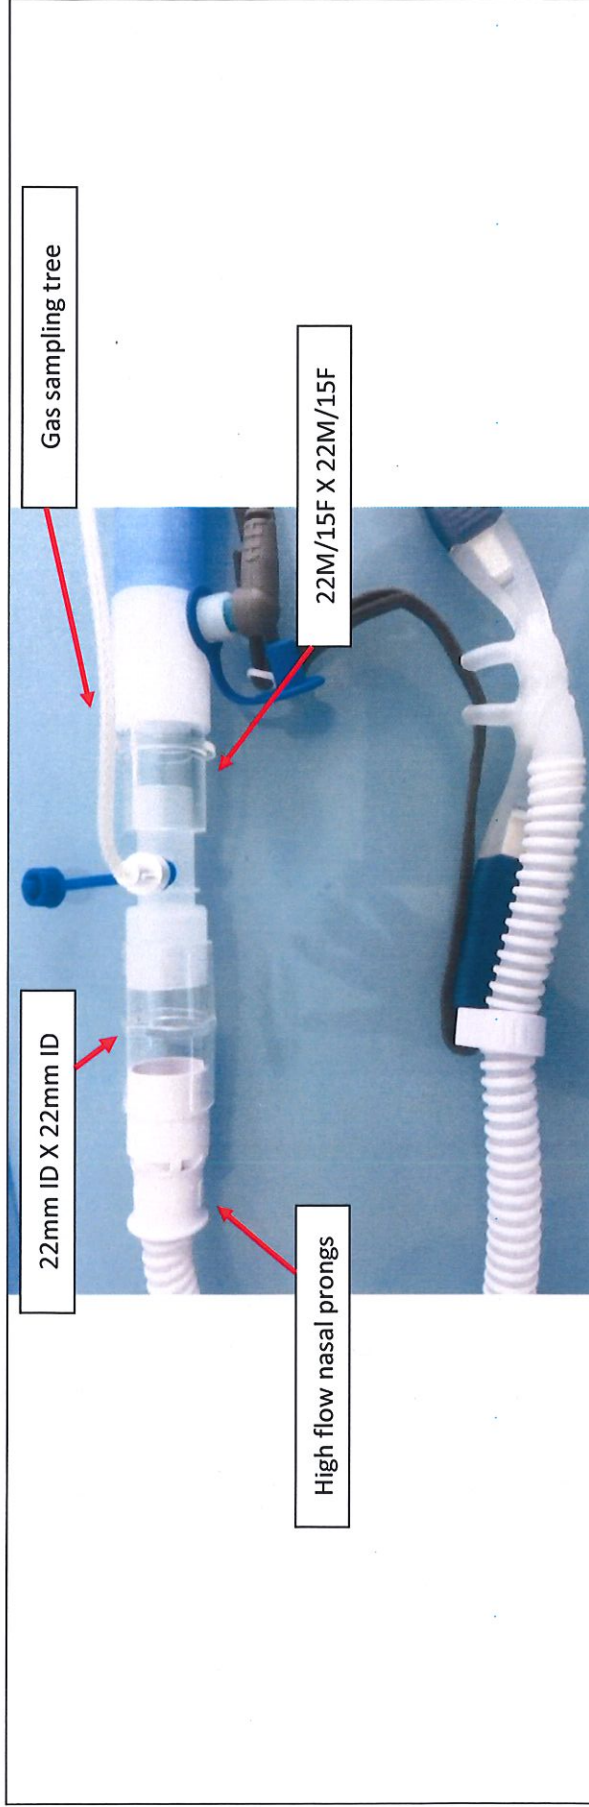

**MANAGEMENT OF NIV NITRIC HI-FLOW SYSTEM**

- Set oxygen, flows and Nitric Oxide as Doctors orders
- If oxygen requirements and flow levels are minimal please consider using standard nasal prongs (ie: if flow requirements are below 30L/min)
